# Scalable In-hospital Decontamination of N95 Filtering Facepiece Respirator with a Peracetic Acid Room Disinfection System

\*Amrita R. John, MD<sup>1</sup>; \*Shine Raju, MD<sup>1</sup>; Jennifer L. Cadnum, BS<sup>2</sup>; Kipum Lee, MDes<sup>3,4</sup>, Phillip McClellan, PhD<sup>5</sup>, Ozan Akkus PhD<sup>5,6,7</sup>, Sharon K. Miller, MSE<sup>8</sup>; Wayne Jennings, PhD<sup>9</sup>; Joy A. Buehler<sup>9</sup>; Daniel F. Li, BS<sup>10</sup>; Sarah N. Redmond, BS<sup>10</sup>; Melissa Braskie, MBA<sup>11</sup>; Claudia K. Hoyen, MD<sup>12</sup>; Curtis J. Donskey, MD<sup>2,13</sup>

**\*Equal author contribution**

## Affiliations:

1. Department of Medicine, University Hospitals Cleveland Medical Center, Cleveland, Ohio
2. Research Service, Louis Stokes Cleveland VA Medical Center, Cleveland, Ohio
3. UH Ventures, Innovation Center, University Hospitals Cleveland Medical Center, Cleveland, Ohio
4. Weatherhead School of Management, Case Western Reserve University, Cleveland, Ohio
5. Department of Mechanical and Aerospace Engineering, Case Western Reserve University, Cleveland, Ohio
6. Department of Biomedical Engineering, Case Western Reserve University, Cleveland, Ohio
7. Department of Orthopedics, Case Western Reserve University, Cleveland, Ohio
8. NASA Glenn Research Center, Environmental Effects and Coatings Branch, Cleveland, Ohio
9. HX5, LLC at NASA Glenn Research Center, Cleveland, OH
10. Case Western Reserve University School of Medicine, Cleveland, Ohio
11. Department of Environmental Health and Safety, University Hospitals Cleveland Medical Center, Cleveland, Ohio
12. Department of Pediatric Infectious Diseases, University Hospitals Cleveland Medical Center, Cleveland, Ohio
13. Geriatric Research, Education, and Clinical Center, Louis Stokes Cleveland VA Medical Center, Cleveland, Ohio

**Corresponding author:**

**Amrita John, MD**

Staff physician, Infectious Diseases and Critical Care

Division of Pulmonary, Critical Care and Sleep Medicine,

Department of Medicine

University Hospitals Cleveland Medical Center

11100 Euclid Avenue, Cleveland, OHIO 44056

Email: [Amrita.John@uhhospitals.org](mailto:Amrita.John@uhhospitals.org)

**Conflicts of interest:**

CJD discloses research funding from Clorox, PDI and Pfizer. OA discloses stipend/ equity from CollaMedic Inc. All other authors have no conflicts of interest to disclose.

**Abbreviations:**

SARS-CoV-2=Severe Acute Respiratory Syndrome Coronavirus; FFR=Filtering facepiece respirator;

PAA=Peracetic acid; COVID-19=Coronavirus disease 2019; PPE=Personal Protective Equipment; CDC=

Center for Disease Control; WHO=World Health Organization; FE=Filtration efficiency; STEL=Short-term exposure limit; TWA=time weighted average; AEGL=Acute exposure guidelines;

AGP=Aerosol generating procedure; PUI=Persons under investigation; HCW=Healthcare worker;

HLDS=High-level disinfection system; EUA= Emergency Use Authorization.

**Keywords:** Peracetic acid, N95 FFR, reuse, disinfection, SARS-CoV-2, PAA

**Acknowledgement:** The authors would like to extend our gratitude to UH Ventures for providing the infrastructure for this study. We would like to thank Altapure Inc™ and chemDAQ Inc™ for their Altapure®

AP-4 room disinfection system and Safecide® E-cell PAA remote monitoring system for use in this study respectively. They did not provide input on study design or interpretation of results.

**Funding:**

No funding sources

**Contributions:**

ARJ, SKR and CJD were involved in conceptualizing the study protocols and writing the manuscript; JLC, DFL and SNR performed the inoculation and microbiological reduction analysis; KL helped with the study design, organization of the work, and drawing the images; PM and OA performed the mechanical elasticity testing on the straps; SKM performed the contact angle testing; JW and JAB performed the SEM imaging and structural testing; MB and CKH helped with filtration efficiency testing.

## Abstract

**Background:** Critical shortages of personal protective equipment (PPE) especially N95 respirators, during the SARS-CoV-2 pandemic continues to be a source of great concern among health care workers (HCWs). Novel methods of N95 filtering facepiece respirator (FFR) decontamination that can be scaled-up for in-hospital use can help address this concern and keep HCWs safe.

**Methods:** A multidisciplinary pragmatic study was conducted to evaluate the use of an ultrasonic room high-level disinfection system (HLDS) that generates aerosolized peracetic acid (PAA) and hydrogen peroxide for decontamination of large numbers of N95 respirators. A cycle duration that consistently achieved disinfection of N95 respirators (defined as  $\geq 6 \log_{10}$  reductions in bacteriophage MS2 and *Geobacillus stearothermophilus* spores inoculated onto respirators) was identified. The treated masks were then assessed for changes to their hydrophobicity, material structure, strap elasticity, and filtration efficiency (FE). Assessment of PAA off-gassing from a treated mask was also performed.

**Results:** The PAA room HLDS was effective for disinfection of N95 respirators in a 2447 cubic feet room with deploy and dwell times of 16 and 32 minutes respectively, and a total cycle time of 1 hour and 16 minutes. After 5 treatment cycles, no adverse effects were detected on filtration efficiency, structural integrity, or strap elasticity. There was no detectable off-gassing of PAA from the treated masks.

**Conclusion:** The PAA room disinfection system provides a rapidly scalable solution for in-hospital decontamination of large numbers of N95 respirators to meet the needs of HCWs during the SARS-CoV-2 pandemic.

## INTRODUCTION

The Severe Acute Respiratory Syndrome Coronavirus 2 (SARS-CoV-2) pandemic has revealed several inadequacies within healthcare. One has been the critical shortage of personal protective equipment (PPE) for healthcare workers (HCWs) on the frontlines of the pandemic response.<sup>1,2</sup> Single-use disposable PPE such as N95 Filtering Facepiece Respirators (FFR) and surgical facemasks are being worn for extended periods or are reused until they become soiled or visibly damaged. Shortages of PPE have been detrimental to the morale of HCWs and places them at risk for infection, death and disability.<sup>3-5</sup> Given these extraordinary challenges, it has become vital to devise novel alternative methods to reuse PPE safely and effectively.

Among all PPE, the critical shortage of N95 FFRs has been most pronounced.<sup>6,7</sup> At the onset of the outbreak, the Centers for Disease Control and Prevention (CDC) had recommended N95 to be used for all interactions with confirmed or suspected COVID-19 patients. It has subsequently modified its guidance regarding PPE required while caring for patients with SARS-CoV-2.<sup>8</sup> At present, both the CDC and the World Health Organization (WHO) recommend the use of N95 FFR for all aerosol-generating procedures (AGP) performed on confirmed COVID-19 patients and persons under investigation (PUI).<sup>9,10</sup> Given the shortage of N95 respirators, the CDC has provided updated guidance for extended use and limited reuse of these respirators by HCWs.<sup>11</sup> Several strategies have been proposed for conserving the supply of PPE including repurposing other devices to be used as FFRs, creating FFRs at home and decontamination of N95s using methods such as ultraviolet-C germicidal irradiation, dry heat, moist heat, and vaporized hydrogen peroxide.<sup>12-15</sup> Vaporized hydrogen peroxide (VHP) has provided the most promising results and was recently given provisional US Food and Drug Administration (FDA) Emergency Use Authorization (EUA) for decontamination of used N95 respirators.<sup>16</sup> Although the availability of VHP decontamination is an important development, the process is labor and time-intensive due to a long treatment cycle and also requires the shipment of used N95 respirators to and from a central processing center.<sup>17</sup>

There remains an urgent need for an effective N95 respirator disinfection process that will allow on-site reprocessing with rapid turnaround times, ease of use with existing personnel and expertise, and flexibility and

scalability to process large quantities of respirators. Ideally, the process should allow for the disinfection of other PPE, such as gowns, surgical face masks, powered air-purifying respirator (PAPR) hoods, and face shields as the needs arise. We previously reported that a high-level disinfection cabinet that generates aerosolized peracetic acid (PAA) and hydrogen peroxide was effective for disinfection of N95 respirators.<sup>18</sup> Here, we expanded on these promising findings by evaluating the use of the same technology on a much larger scale for whole-room disinfection of a large number of respirators and evaluated the impact of the treatment on mask performance.

## **METHODS**

A multi-institutional study was conducted by researchers at University Hospitals Cleveland Medical Center (UHCMC), Case Western Reserve University (CWRU), National Aeronautical and Space Administration (NASA) Glenn Research Center and the Cleveland Veterans Affairs Medical Center (VAMC) to evaluate the use of an ultrasonic room disinfection system that generates aerosolized PAA and hydrogen peroxide for disinfection of large numbers of N95 respirators.

### **Protection of Human Research Participants**

The proposed PAA disinfection experiments were approved by an internal safety review at University Hospitals Cleveland Medical Center (UHCMC). The microbiologic analyses were approved by the Biosafety Committee at the VAMC. Institutional Review Board approval was not obtained as human subjects were not enrolled in the study.

### **Development and Optimization of the PPE Decontamination Room**

The PAA room high-level disinfection system (HLDS) (AP-4™, Altapure, Mequon, WI) was placed in the center of a 16.3 x 16 x 9.5 foot room (2447 cu. ft) (**Figure 1A-E**). The device uses ultrasonic vibrations to generate a dense cloud of submicron droplets of PAA, each containing peracetic acid (0.18%), hydrogen peroxide (0.88%), water (98.58%); and the remainder being inert ingredients.<sup>19</sup> The aerosol decomposes into water vapor, acetic acid (vinegar) and oxygen and is non-toxic. The decontamination cycles consisted of 4 phases: Deploy

(deployment of the PAA submicron aerosols to fill the room), Dwell (aerosols left to stand in the room), Scrub (clearance of the aerosol by dehumidification and by drawing it through activated charcoal filters) and Vent (fresh air is circulated through the room by opening the manual vents enabling clearance of residual vapors and drying of the masks). The ventilation in the test room was modified to allow the influx and circulation of fresh air at the end of the scrub cycle. An extra air scrubber (HJ-200™, Altapure, Mequon, WI) was deployed to keep vent times to a minimum by accelerating clearance of residual PAA. The deploy and dwell times are directly responsible for microbial reduction, whereas the scrub and the vent cycles impact clearance of residual PAA vapors to recommended safe levels. There are no specific OSHA standards for PAA.<sup>20</sup> The American Conference of Governmental Hygienists (ACGIH) recommends a Threshold Limit Value (TLV) of 0.4 ppm, as a 15-minute Short Term Exposure Limit (STEL).<sup>20-22</sup> The U.S. Environmental Protection Agency (EPA) recommended Acute Exposure Guidelines (AEGL-1) limit is 0.17 ppm/0.52 mg/m<sup>2</sup>.<sup>23</sup>

Before the start of the disinfection cycle, the deploy, dwell, scrub and vent phase times were manually configured using the application programming interface (API) on the accompanying digital tablet (**Figure 2**), which in turn, remotely connected to the HLDS using Bluetooth® technology. The deploy and the dwell times were adjusted to provide effective disinfection of the masks with the least possible amount of exposure to the PAA. The PAA concentrations in the room were measured in real-time by a PAA sensor (Safecide™, chemDAQ, Pittsburgh, PA). At the end of the vent cycle, PAA concentrations were at 0.12 ppm, below the AEGL-1 limit of 0.17 ppm (**Figure 3**). The 15-minute time-weighted average (TWA) of PAA concentration after the decontamination cycle was 0.08 ppm (15-min STEL for PAA is 0.4 ppm).

Three test cycles were evaluated to identify a cycle time achieving consistent disinfection of bacteriophage MS2 and *G. stearothermophilus* spores inoculated onto N95 respirators. The deploy time on these test cycles ranged from 12 minutes (default settings for a room of 2447 cu. ft) to 19 minutes. The shortest cycle tested was 44 minutes (deploy: 12 minutes, dwell: 8 minutes, scrub: 8 minutes and vent: 16 min). Based on the results, the cycle times were incrementally adjusted to get an optimal cycle time. The optimal cycle was identified as being the

shortest cycle at which disinfection was consistently achieved (deploy: 16 minutes, dwell: 32 minutes, scrub: 12 minutes and vent: 16 minutes). This cycle was then repeated up to 5 times with sterile masks that were then sent for analysis of structural integrity, filtration efficiency and strap integrity

### **Efficacy of the decontamination process for treatment of contaminated N95 respirators**

The model 1860 N95 (3M, Minneapolis, USA) respirator was studied because it was the respirator used at the study hospital. Twenty new respirators were tested from 2 different lots available from the hospital inventory. Two N95 respirators were used for each decontamination test cycle. The test and control respirators were inoculated with  $\sim 10^6$  colony-forming units (CFU) of *G. stearothermophilus* spores and  $\sim 10^6$  plaque-forming units (PFU) of bacteriophage MS2 on the outer and inner surface of the respirator using previously described methods.<sup>18,24,25</sup> In brief, the test organisms suspended in 8% simulated mucus,<sup>26</sup> and 10  $\mu$ L aliquots were pipetted onto the respirator surface and spread with a sterile loop to cover an area of 1 cm<sup>2</sup> and allowed to air dry. The test N95 respirators were suspended using metallic ‘S’ shaped hooks from metal wire shelving carts at a height of 6ft (height of the tallest shelf) and exposed to PAA submicron droplets. The control masks were left untreated at room temperature, maintained at 68°F.

After the disinfection treatments, the inoculated sections of the N95 respirators were cut out, vortexed for 1 minute in 1 mL of phosphate-buffered saline with 0.02% Tween and serial dilutions were plated on selective media to quantify viable organisms. Broth enrichment cultures were used to assess for recovery of low levels of *G. stearothermophilus* spores. All tests were performed in triplicate. Log<sub>10</sub> CFU or PFU reductions were calculated by comparing recovery from treated versus untreated control respirators.

### **Evaluation of Contact Angle on the Surface of Treated N95 Respirators**

The contact angle on the surface of untreated and treated N95 respirators was measured with a Kernco Instruments contact angle meter at the NASA Glenn Research Center. A micropipette was used to place a small droplet of deionized water on the surface (outer green layer) of a  $\sim 1/2'' \times 1''$  section cut from each mask with scissors. Contact



angle ( $\theta$ ) (**Figure 4**) for each of 3 drops was measured using the Goniometer scale on the instrument for each sample. The range of angles measured was documented (**Table 1**).

### **Evaluation of N95 Respirator Structural Integrity by Scanning Electron Microscopy**

The outer (green) fabric of the mask was examined using scanning electron microscopy (SEM) at the NASA Glenn Research Center. Samples of approximately 1”x1” cut from each mask with scissors were coated with a 10 nm layer of platinum to reduce charging in the electron beam and then mounted to a 4” pin-mount platen with conductive carbon tape for SEM viewing. A Tescan MAIA-3 Scanning Electron Microscope was used to view the fibers in each mask sample. The test parameters were: accelerating voltage, 1 kV; working distance, 15 mm; beam intensity, set at 8 resulting in an absorbed current of about 180pA; and spot size, ~28 nm.

### **Effect of treatment on elasticity of the respirator straps**

Three samples were cut from elastic straps of two masks at each sterilization cycle (0, 3 and 5 cycles), resulting in a sample size of 6 per group. Samples were 3 cm in length and were mounted to the grips of a tensile testing machine. The gage length of specimens was set at 1 cm length. Samples were loaded under displacement control (800L, Testresources, Minnetonka, MN) at a rate of 1 mm/sec. The testing profile included two cycles of load relaxation such that in each cycle the samples were loaded to 300% strain (i.e. to net length of 30 mm following 20 mm deformation), with samples held at constant deformation for 5 minutes. There was a 5-minute period between the end of the first cycle and the beginning of the second cycle. The load attained at 300% strain was obtained from the curves for each cycle as ‘Load 1’ and ‘Load 2’ values. Load-relaxation was calculated for each cycle as the difference of the loads at the beginning and end of load period as ‘Relaxation 1’ and ‘Relaxation 2’. As such, relaxation represents the capacity of straps to retain a load over time. Elasticity of samples was calculated as the secant stiffness from the loading portion of cycle 1 and defined as ‘Stiffness 1’. Secant stiffness was the slope of the line connecting the origin with the point that is defined as Load 1. Owing to the limited sample size, a non-parametric Kruskal-Wallis test was used for one-way analysis of variance (ANOVA) at a significance level of  $P<0.05$ .

## **Filtration efficiency of the N95 masks following exposure to PAA vapor**

Evaluation of filtration efficiency was performed at ICS Laboratories, Inc. (Brunswick, OH). N95 respirators subjected to a multiple runs of the optimal cycle were subjected to testing for instantaneous filtration efficacy in accordance with NIOSH standard TEB-APR-STP-0059, “Determination of Particulate Filter Efficiency Level for N95 Series Filters against Solid Particulates for Non- Powered, Air-Purifying Respirators Standard Testing Procedure” Revision 3.2, 13 December 2019. The masks were conditioned at 85% +/- 5% relative humidity and 38°C +/- 2°C for 25 hours prior to the filter efficiency test. Each mask was then assembled into a fixture and subjected to instantaneous aerosol loading. The sodium chloride aerosol was neutralized to a Boltzmann equilibrium state at 25 +/- 5°C and a relative humidity of 30 +/- 10%. Particle size distribution was verified to be a count median diameter of 0.075 +/- 0.020 microns, with a geometric standard deviation not exceeding 1.86. Upon displaying instantaneous filtration efficiency exceeding 95%, the remaining respirators were subjected to full loading. The loading was performed by depositing 200 mg of sodium chloride aerosol at an airflow rate of 85LPM for one minute. Flow rate was monitored every 5-10 minutes on average and adjusted to maintain a flow rate of 85 LPM +/- 2 LPM. The initial flow rate, initial resistance, and initial penetration, and maximum penetration data were recorded.

## **Measurement of PAA off-gassing after disinfection**

The N95 FFR was placed in an airtight polycarbonate container (0.31 cu. ft) along with the PAA sensor (Safecide™, chemDAQ, Pittsburgh, PA) immediately after the optimal disinfection cycle was completed. A small fan was placed inside the container to ensure adequate air circulation. A 15-minute TWA for PAA exposure was measured. This test was repeated twice.

## RESULTS

### Efficacy of PAA disinfection of N95 masks:

As shown in **Figure 5**, 6 log<sub>10</sub> reductions in *G. stearothermophilus* spores were achieved on inoculated 1860 N95 FFRs with all cycle durations. For bacteriophage MS2, 6 log<sub>10</sub> reductions were achieved on the inoculated 1860 N95 FFRs with the 16-minute deploy and 32-minute dwell (total cycle time 76 minutes) and the 19-minute deploy and 32-minute dwell (total cycle time 87 minutes) cycles, whereas only ~4 log<sub>10</sub> reductions were achieved with the 12-minute deploy and 8-minute dwell cycle.

### Structural integrity of the N95 masks following exposure to aerosolized PAA:

SEM analysis indicated evidence of bubbles on the surface of the PAA-treated respirator outer fabric fibers which appeared to increase with the number of PAA cycles (**Figure 6A-F**). Energy Dispersive Spectroscopy dot map images of the bubble feature on PAA Cycle 4 outer mask fabric indicating that the bubbles are high in oxygen, phosphorous and nitrogen based on the bright areas of the dot map images. The overall spectrograph shows that the surface is predominantly carbon, oxygen and phosphorous. (**Figure 7A,B**)

### Evaluation of the contact angle on the surface of the treated N95 masks:

Contact angle did not change with repeated cycles of PAA disinfection (**Table 1**) indicating that hydrophobicity was preserved.

### Effect of treatment on elasticity of the respirator straps:

None of the mechanical properties were affected significantly by the number of cycles of sterilization (*P* values ranged from 0.27 to 0.505). **Figure 8.A.** shows the two-cycle stress relaxation loading protocol. **Figure 8.B.** shows the load versus time profile and including the load-relaxation for each cycle calculated as the difference of the loads at the beginning and end of load period and shown as ‘Relaxation 1’ and ‘Relaxation 2’. **Figure 8.C.** shows the load versus deformation behavior over the two cycles. As such, relaxation represents the capacity of

straps to retain a load over time. Elasticity of samples was calculated as the secant stiffness from the loading portion of cycle 1 and defined as ‘Stiffness 1’. Secant stiffness was the slope of the line connecting the origin with the point that is defined as Load 1 in Figure 8.C. Based on these data, elasticity, viscoelasticity and load retention capacity of the strap material were retained for up to 5 cycles (**Figure 9**).

### **Filtration efficacy of the N95 masks following exposure to PAA vapor:**

**Table 2** shows the results of instantaneous filtration efficiency on the masks subjected to 3 and 5 optimal cycles of PAA treatment. There was no decline in instantaneous filtration efficiency in the N95 respirators for up to 5 cycles of PAA disinfection. **Table 3** outlines the results of the full loading tests on the masks subjected to 5 optimal cycles of PAA treatment. This showed that filtration efficiency continued to be >95%. The respirators exhibited Type IV loading profiles as outlined in NIOSH TEB-APR-STP-0059.

### **PAA off-gassing from the N95 respirators after disinfection:**

There was no detectable off-gassing from the treated masks after the disinfection cycle. The 15-minute TWA measured was 0.00 ppm.

## **DISCUSSION**

The goal of this investigation was to address the urgent need for an effective N95 respirator decontamination process allowing onsite reprocessing with a rapid turnaround time, ease of use, and scalability to process large numbers of respirators. We found that the PAA room disinfection system was easy to set up, operate and was effective for disinfection of N95 respirators with a total cycle time of 1 hour and 16 minutes. Using multiple methods, we did not detect any adverse effects on filtration efficiency, structural integrity, or strap elasticity after 5 treatment cycles. There was no detectable off-gassing of PAA from the treated masks. These results suggest that the PAA room disinfection system provides a scalable solution for in-hospital decontamination of N95 respirators to meet the needs of HCWs during the SARS-CoV-2 pandemic.

Microbiological agents chosen to test for disinfection were based on guidance provided by the FDA EUA document.<sup>27</sup> During the Ebola outbreak, the CDC recommended use of disinfectants that were registered to be effective against non-enveloped viruses - as compared to enveloped viruses such as SARS-CoV-2- since they were more resistant to disinfection.<sup>28,29</sup> Bacteriophage MS2 is a non-enveloped virus that has been used as a surrogate in studies looking at airborne RNA viral pathogens, as well as disinfectant studies performed by the U.S. EPA.<sup>30-32</sup> *G. stearothermophilus* spores have been used in the study of PAA decontamination of surfaces.<sup>33</sup>

Our findings are consistent with previous studies that demonstrated the efficacy of the PAA disinfection system. Both the room HLDS and a high-level disinfection cabinet were effective in reducing pathogens, including *C. difficile* spores, on steel disk carriers by greater than 6 log<sub>10</sub> CFU.<sup>24,34</sup> However, an extended cycle with the disinfection cabinet was required to achieve a 6 log<sub>10</sub> reduction in bacteriophage MS2 inoculated on N95 respirators.<sup>18</sup> In the current study, an extended cycle was also required to achieve a 6 log<sub>10</sub> reduction in bacteriophage MS2 or *G. stearothermophilus* spores on N95 respirators. Similarly, Battelle has reported a prolonged VHP cycle time with a total time of 480 minutes for N95 decontamination.<sup>17</sup>

Our results demonstrate that the N95 respirators retain their structural integrity, outer surface hydrophobicity and strap elasticity for at least 5 repeated cycles of PAA treatment. However, on a microscopic level, there was evidence of visible bubbling on the non-woven polypropylene fibers of the outer layer, which increased proportionally with the duration of exposure to PAA. The significance of these bubbles are unclear at this time. It could be indicative of a trend towards loss of structural integrity with continued exposure to PAA. These changes, however, did not affect the FE of the treated masks. Off-gassing from the PAA treated mask was undetectable. This may be explained by the low concentrations of PAA in the aerosols, relatively much shorter exposure times to PAA when compared to VHP and the inherently unstable nature of the compound leading to its rapid decomposition.<sup>17,35</sup>

The PAA room disinfection system offers several potential advantages over other technologies being evaluated for PPE decontamination. The technology is substantially more effective than ultraviolet-C light for N95 decontamination.<sup>18</sup> The platform is scalable and can be set up in real-world hospital settings. We conservatively estimate that about 2000 N95 respirators could be effectively disinfected in a room with the dimensions of the test room (2447 cu. ft), with capacity increasing proportionally to the room dimensions. The PAA room HLDS is currently used for terminal disinfection of patient rooms in some centers across the US and abroad. It can be readily repurposed for N95 decontamination without much added costs. PAA works at room temperatures and requires a shorter cycle time than many other disinfection methods. While the use of VHP is not recommended with cellulose-containing materials, PAA could potentially be used with masks containing cellulose.

The PAA room disinfection system has some disadvantages. The PAA aerosols are hazardous requiring that the ventilation system is closed and the room sealed during operation. While the AP-4 HLDS is designed to disinfect rooms of varying sizes, it does not effectively disinfect spaces larger than 4000 cu ft.

Our study has some limitations. Only one brand and model of N95 FFR was evaluated. There are variations in the construction and materials of different N95 respirators and thus further studies are needed with other N95 brands. Our sample size was small, in keeping with the need to preserve N95 FFRs for HCWs. We only evaluated N95 structural integrity and filtration efficiency for up to 5 treatment cycles. Studies are needed to assess the impact of increased number of treatments. Despite these limitations, our study has the advantage of including assessments by a multidisciplinary group which helped evaluate the different factors that would affect the reusability of an N95 FFR.

## **CONCLUSION**

We found that a PAA room HLDS was effective for the decontamination of N95 respirators with a short cycle time. No adverse effects on filtration efficiency, structural integrity, or strap elasticity were detected after 5

treatment cycles. The PAA room HLDS system provides a rapidly scalable solution for hospitals requiring in-hospital disinfection of N95 respirators.

## REFERENCES

1. Wang X, Zhang X, He J. Challenges to the system of reserve medical supplies for public health emergencies: reflections on the outbreak of the severe acute respiratory syndrome coronavirus 2 (SARS-CoV-2) epidemic in China. *Bioscience trends*. 2020;14(1):3-8.
2. O'Reilly KB. This is war: We must tackle shortages hampering COVID-19 effort. 2020; <https://www.ama-assn.org/delivering-care/public-health/war-we-must-tackle-shortages-hampering-covid-19-effort>.
3. BBC. Coronavirus: PPE shortage creating 'immense distress' for nurses. 2020, April 18; <https://www.bbc.com/news/uk-wales-52339103>.
4. Soumya Karlamangla AC, Emily Baumgaertner. Despite promises of more masks, doctors and nurses have to reuse N95s. 2020, April 14; <https://www.latimes.com/california/story/2020-04-14/coronavirus-ppe-shortage-persists-hospitals>.
5. Sherry L. Burrer CMAdP, CDC; Michelle M. Hughes, CDC; David T. Kuhar, CDC; Sara E. Luckhaupt, CDC; Clinton J. McDaniel, CDC; Rachael M. Porter, CDC; Benjamin Silk, CDC; Matthew J. Stuckey, CDC; Maroya Walters, CDC. Characteristics of Health Care Personnel with COVID-19 — United States, February 12–April 9, 2020. *MMWR Morb Mortal Wkly Rep*. 2020(69):477–481.
6. Nierenberg A. Where Are All the Masks? 2020, April 3; <https://www.nytimes.com/article/face-masks-coronavirus.html>.
7. OSHA. Enforcement Guidance for Respiratory Protection and the N95 Shortage Due to the Coronavirus Disease 2019 (COVID-19) Pandemic. 2020, April 3; <https://www.osha.gov/memos/2020-04-03/enforcement-guidance-respiratory-protection-and-n95-shortage-due-coronavirus>.
8. CDC. Healthcare Infection Prevention and Control FAQs for COVID-19. 2020, April 12; <https://www.cdc.gov/coronavirus/2019-ncov/hcp/infection-control-faq.html>.
9. CDC. Interim Infection Prevention and Control Recommendations for Patients with Suspected or Confirmed Coronavirus Disease 2019 (COVID-19) in Healthcare Settings. 2020, April 13; <https://www.cdc.gov/coronavirus/2019-ncov/hcp/infection-control-recommendations.html>.
10. WHO. Infection prevention and control during health care when novel coronavirus (nCoV) infection is suspected. 2020, March 19; WHO reference number: WHO/2019-nCoV/IPC/2020.2013. Available at: [https://www.who.int/publications-detail/infection-prevention-and-control-during-health-care-when-novel-coronavirus-\(ncov\)-infection-is-suspected-20200125](https://www.who.int/publications-detail/infection-prevention-and-control-during-health-care-when-novel-coronavirus-(ncov)-infection-is-suspected-20200125).
11. NIOSH. Recommended Guidance for Extended Use and Limited Reuse of N95 Filtering Facepiece Respirators in Healthcare Settings. 2020; <https://www.cdc.gov/niosh/topics/hcwcontrols/recommendedguidanceextuse.html>.
12. Bauchner H, Fontanarosa PB, Livingston EH. Conserving Supply of Personal Protective Equipment—A Call for Ideas. *Jama*. 2020.
13. Price AD, Cui Y, Liao L, et al. Is the fit of N95 facial masks effected by disinfection? A study of heat and UV disinfection methods using the OSHA protocol fit test. *medRxiv*. 2020:2020.2004.2014.20062810.
14. Oral E, Wannomae KK, Connolly RL, et al. Vapor H2O2 sterilization as a decontamination method for the reuse of N95 respirators in the COVID-19 emergency. *medRxiv*. 2020:2020.2004.2011.20062026.
15. Anderegg L, Meisenhelder C, Ngooi CO, et al. A Scalable Method of Applying Heat and Humidity for Decontamination of N95 Respirators During the COVID-19 Crisis. *medRxiv*. 2020:2020.2004.2009.20059758.
16. USFDA. Investigating Decontamination and Reuse of Respirators in Public Health Emergencies. 2020, April 10; <https://www.fda.gov/emergency-preparedness-and-response/mcm-regulatory-science/investigating-decontamination-and-reuse-respirators-public-health-emergencies>.
17. Battelle. Final Report for the Bioquell Hydrogen Peroxide Vapor (HPV) Decontamination for Reuse of N95 Respirators. 2016, July 22; <https://www.fda.gov/media/136386/download>.
18. Cadnum JL LD, Redmond SN, John AR, Pearlmutter B, Donskey C. Effectiveness of Ultraviolet-C Light and a High-Level Disinfection Cabinet for Decontamination of N95 Respirators. *Pathogens and Immunity*. 2020;5(1):52-67.
19. Altapure. <https://altapure.com/technology/altacare/>.
20. OSHA. <https://www.osha.gov/dts/sltc/methods/partial/pv2321/pv2321.pdf>.
21. USDA. <https://www.fsis.usda.gov/wps/wcm/connect/df3f6030-a4c4-4064-b156-e813bb49e577/Peroxyacetic-Acid.pdf?MOD=AJPERES>.
22. ACGIH. *2019 Guide to Occupational Exposure Values*. 2019.



23. Agency USEP. [https://www.epa.gov/sites/production/files/2014-09/documents/peracetic\\_acid\\_final\\_volume8\\_2010\\_0.pdf](https://www.epa.gov/sites/production/files/2014-09/documents/peracetic_acid_final_volume8_2010_0.pdf).
24. Mana TS, Sitzlar B, Cadnum JL, Jencson AL, Koganti S, Donskey CJ. Evaluation of an automated room decontamination device using aerosolized peracetic acid. *American journal of infection control*. 2017;45(3):327-329.
25. Tomas ME, Kundrapu S, Thota P, et al. Contamination of Health Care Personnel During Removal of Personal Protective Equipment. *JAMA Intern Med*. 2015;175(12):1904-1910.
26. Masiuk T, Kadakia P, Wang Z. Development of a physiologically relevant dripping analytical method using simulated nasal mucus for nasal spray formulation analysis. *Journal of pharmaceutical analysis*. 2016;6(5):283-291.
27. (FDA) UFaDA. Enforcement Policy for Face Masks and Respirators During the Coronavirus Disease (COVID-19) Public Health Emergency (Revised). 2020, April.
28. McDonnell GE. *Antisepsis, disinfection, and sterilization: types, action, and resistance*. John Wiley & Sons; 2017.
29. CDC. Interim Guidance for Environmental Infection Control in Hospitals for Ebola Virus. 2014, August 1; <https://www.cdc.gov/vhf/ebola/clinicians/cleaning/hospitals.html>.
30. Joseph Wood WR, Michelle Sunderman. Evaluating Low Concentration Hydrogen Peroxide Vapor for Inactivation of Ebola Virus Surrogates Phi6 and MS2 Bacteriophage. US EPA Decontamination Conference; 2019, November 19-21; Norfolk, VA.
31. Wood JP, Richter W, Sunderman M, Calfee MW, Serre S, Mickelsen L. Evaluating the Environmental Persistence and Inactivation of MS2 Bacteriophage and the Presumed Ebola Virus Surrogate Phi6 Using Low Concentration Hydrogen Peroxide Vapor. *Environmental Science & Technology*. 2020;54(6):3581-3590.
32. Gendron L, Verreault D, Veillette M, Moineau S, Duchaine C. Evaluation of Filters for the Sampling and Quantification of RNA Phage Aerosols. *Aerosol Science and Technology*. 2010;44(10):893-901.
33. Wood JP, Calfee MW, Clayton M, Griffin-Gatchalian N, Touati A, Egler K. Evaluation of peracetic acid fog for the inactivation of Bacillus anthracis spore surrogates in a large decontamination chamber. *Journal of hazardous materials*. 2013;250-251:61-67.
34. Kumar JA, Cadnum JL, Jencson AL, Donskey CJ. Efficacy of a multi-purpose high level disinfection cabinet against Candida auris and other health care-associated pathogen. *American journal of infection control*. 2019.
35. National Center for Biotechnology Information. PubChem Database. Peracetic acid, CID=6585. <https://pubchem.ncbi.nlm.nih.gov/compound/Peracetic-acid> (accessed on Apr. 21, 2020).

## Figures and Legends

Figure 1 (A-E)

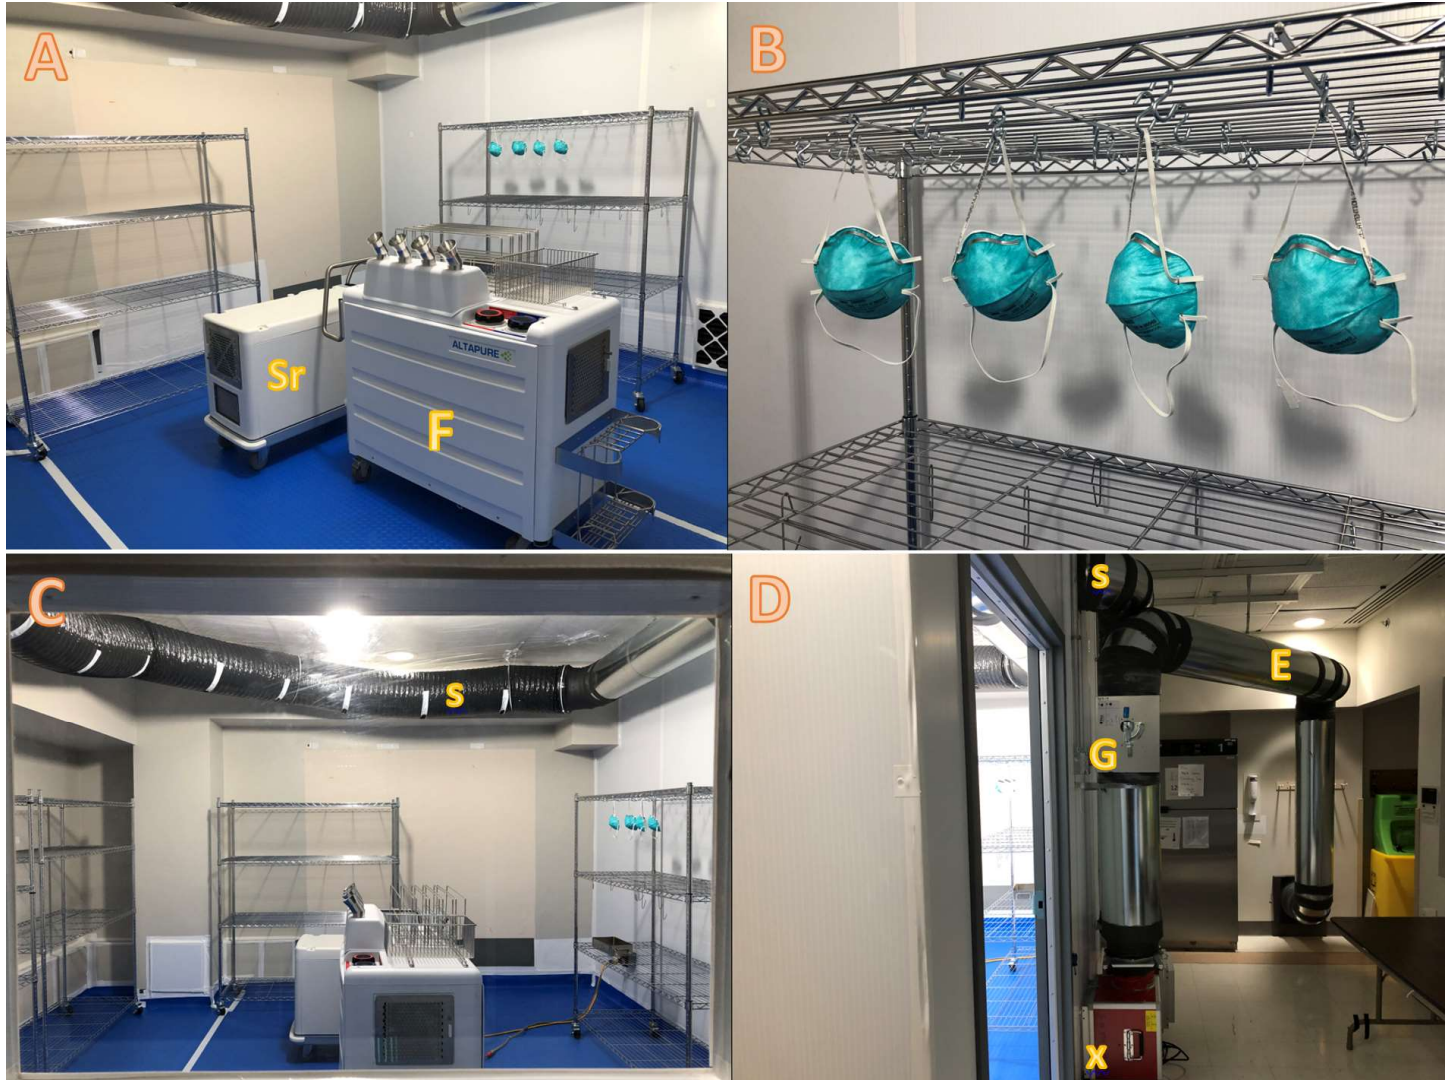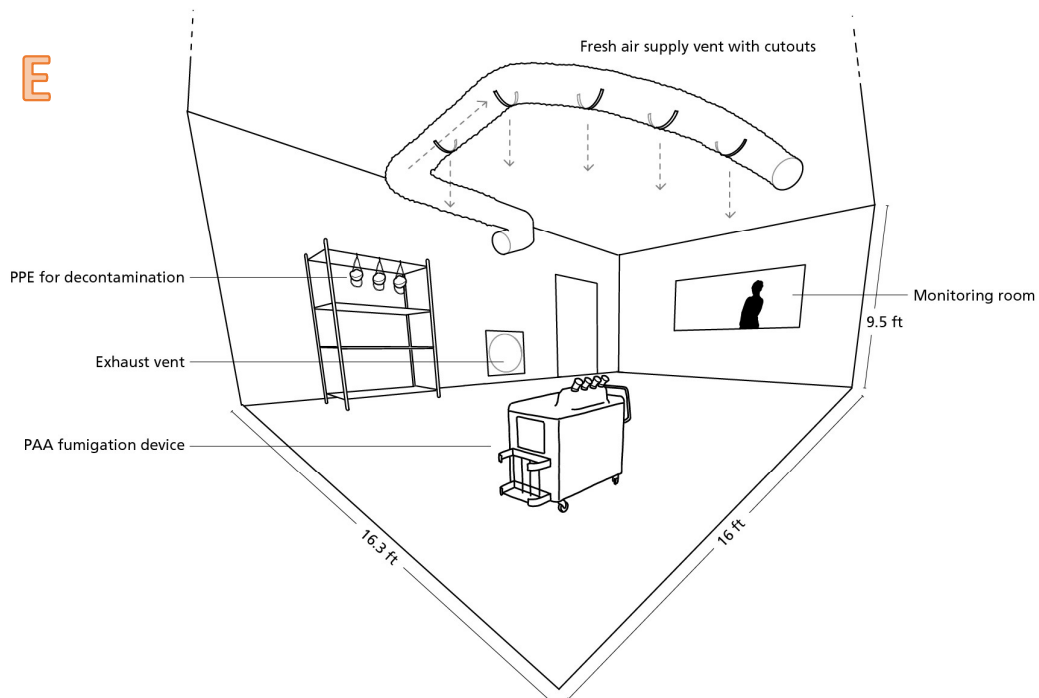

Legend: Figure 1 shows A) Placement of the fumigator (F) and extra scrubber (Sr) in the middle of the test room B) N95 masks suspended on 'S' shaped hooks C) Test room layout with ventilation on the ceiling providing fresh air (supply) into the room during the vent cycle D) the ventilation set up with supply (S) and exhaust (E); note two 600 cfm blower fans (X) in a push-pull configuration with manually operated gasketed dampers (G). E) Schematic diagram of the room dimensions and ventilation system.

Figure 2 (A,B)

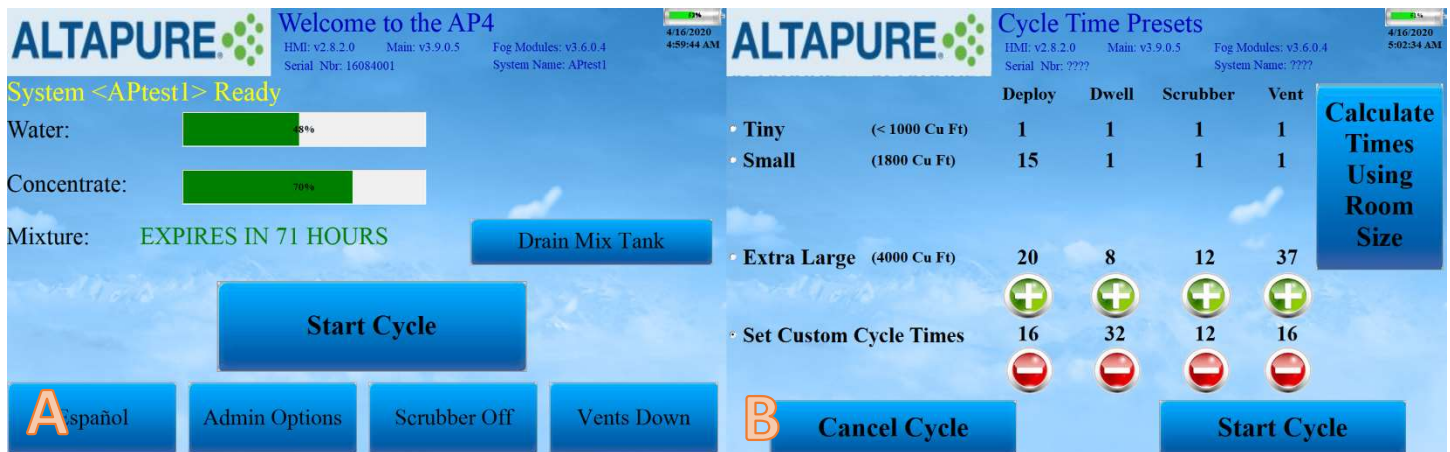

Legend: Figure 2 shows the API which controls the fumigator via Bluetooth technology. A) Home screen with water and concentrate levels B) Interface which lets the operator set cycle times

**Figure 3:**

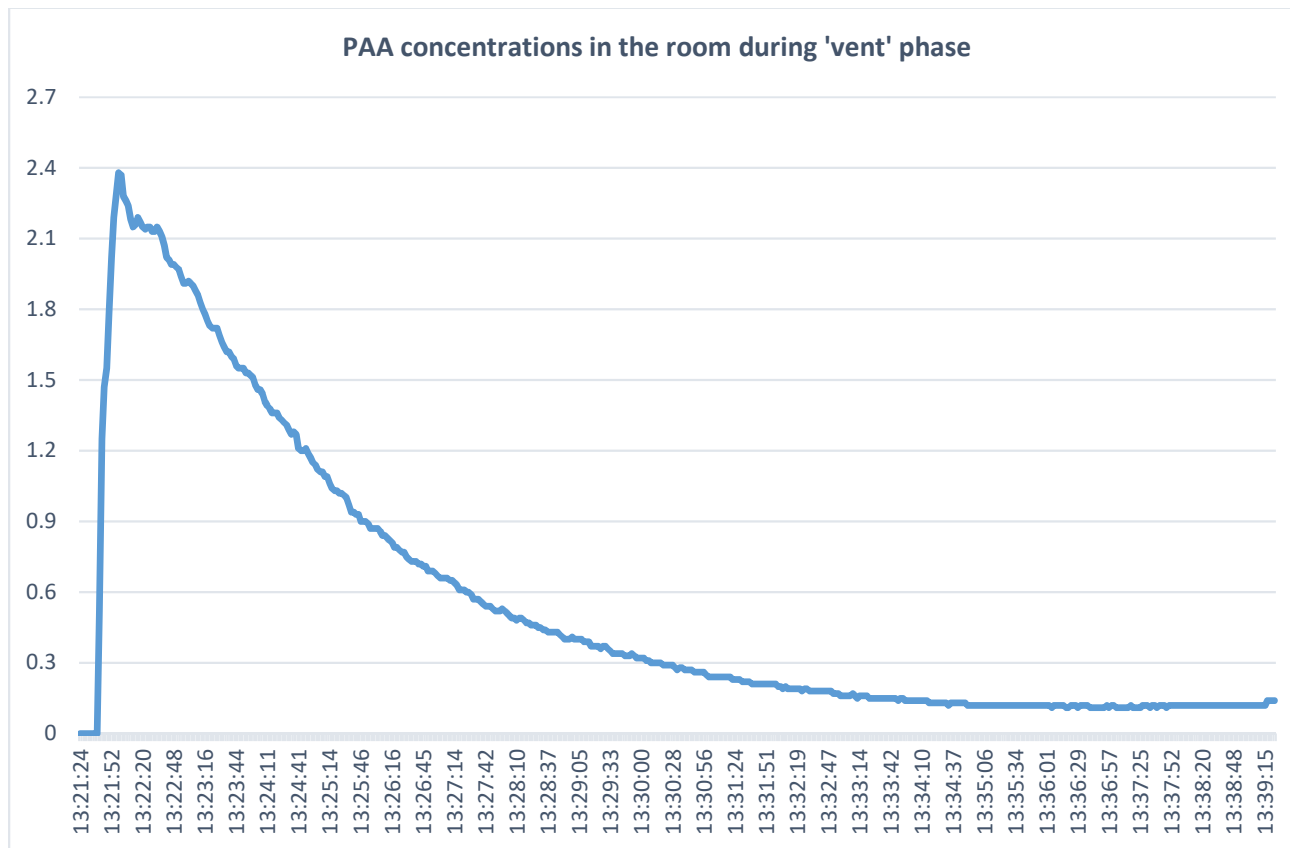

Legend: Figure 3 shows the PAA concentrations in the test room at the beginning of the vent phase when the blower fans are turned on (active ventilation). PAA concentrations in the room drop to 0.12 ppm after 16 minutes. (The AEGL-1 limit for PAA over a 10 min or 8 hour period is 0.17 ppm)

**Figure 4:**

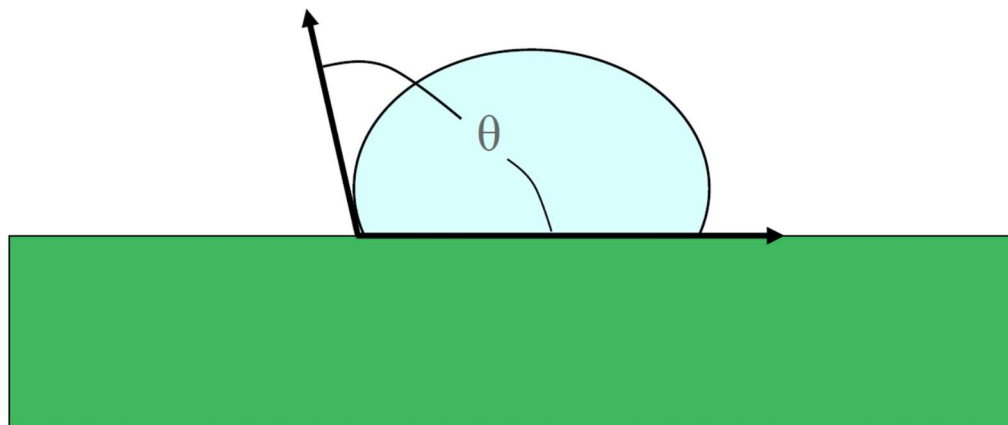

Legend: Figure 4 demonstrates measurement of the contact angle during hydrophobicity testing.

**Figure 5:**

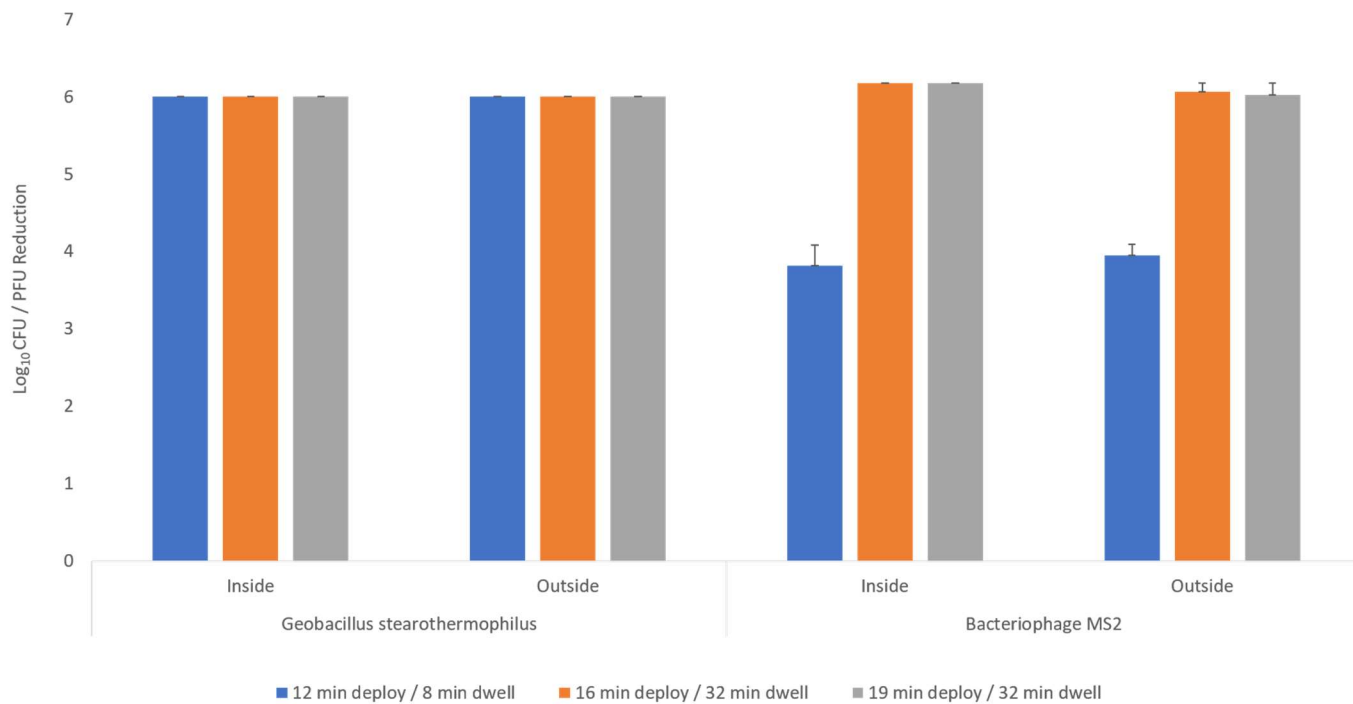

Legend: Figure 5: Efficacy of PAA HLDS for decontamination or disinfection of *G. stearothermophilus* spores and MS2. The respirator was exposed to 3 different cycles as in the figure and log<sub>10</sub> reductions CFU/PFU studied. Error bars indicate standard error

Figure 6 (A-F)

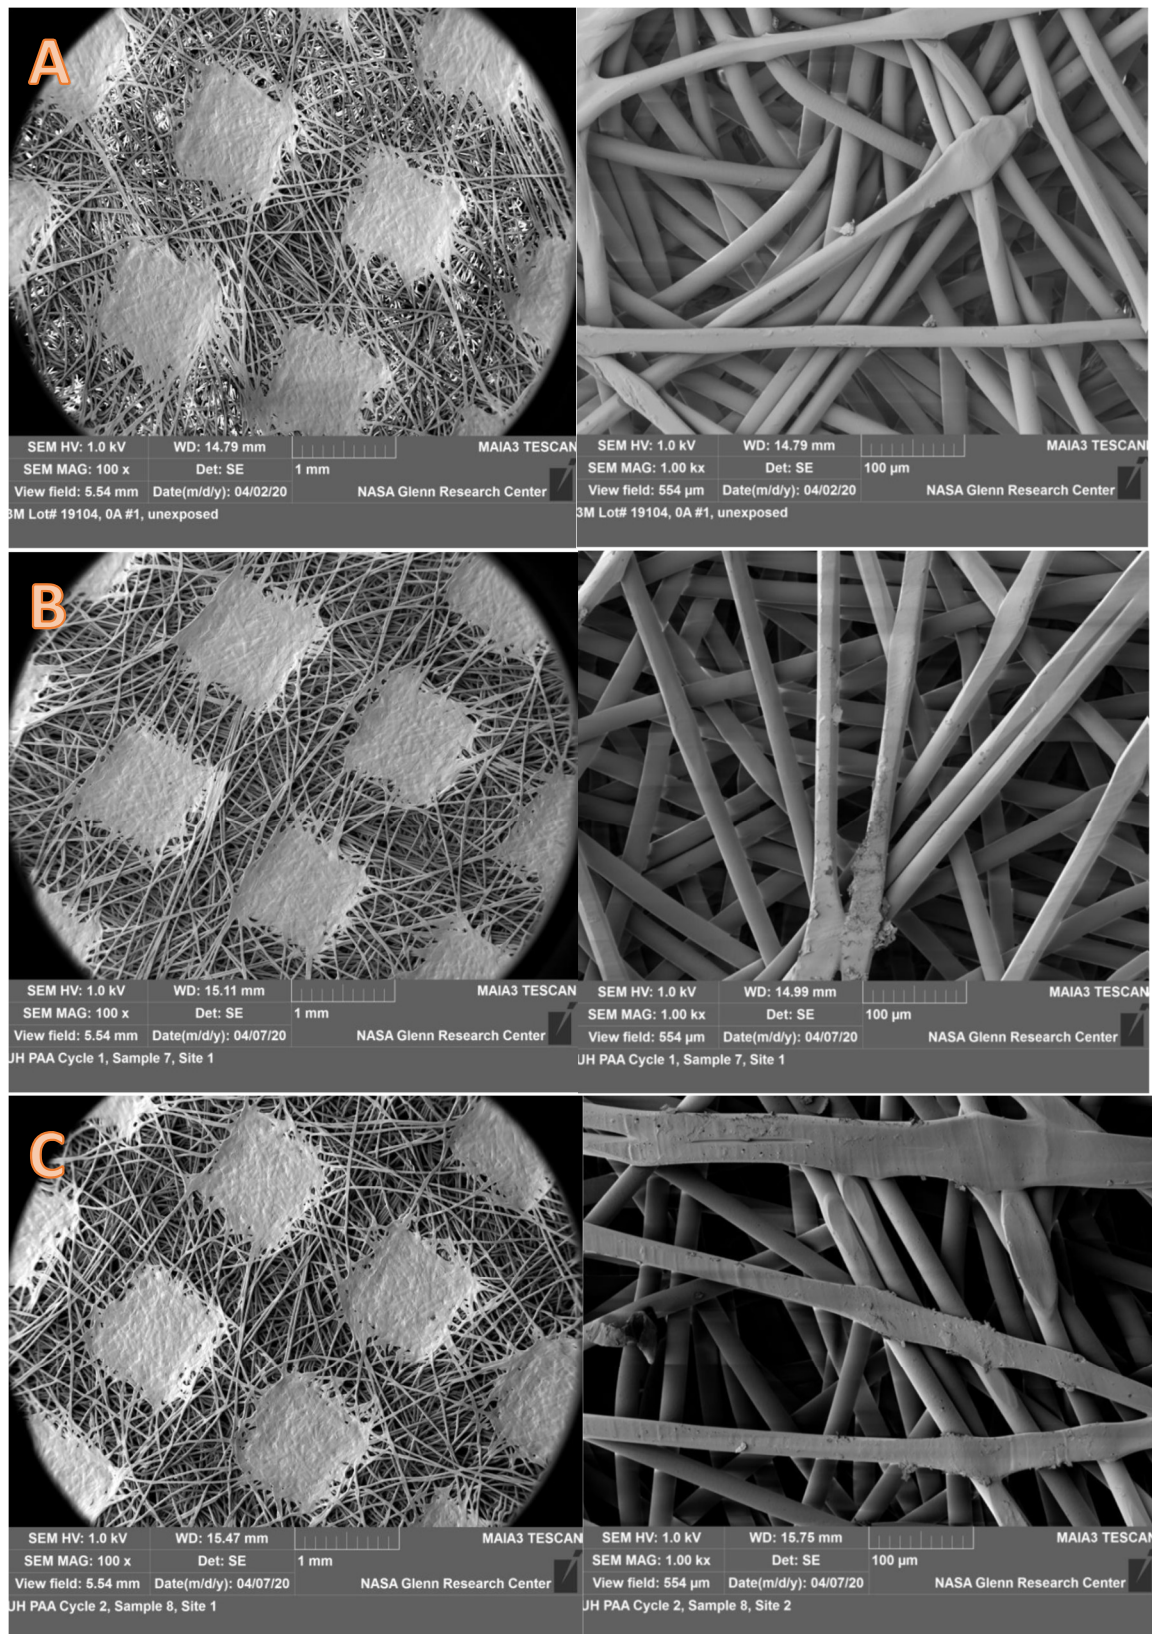

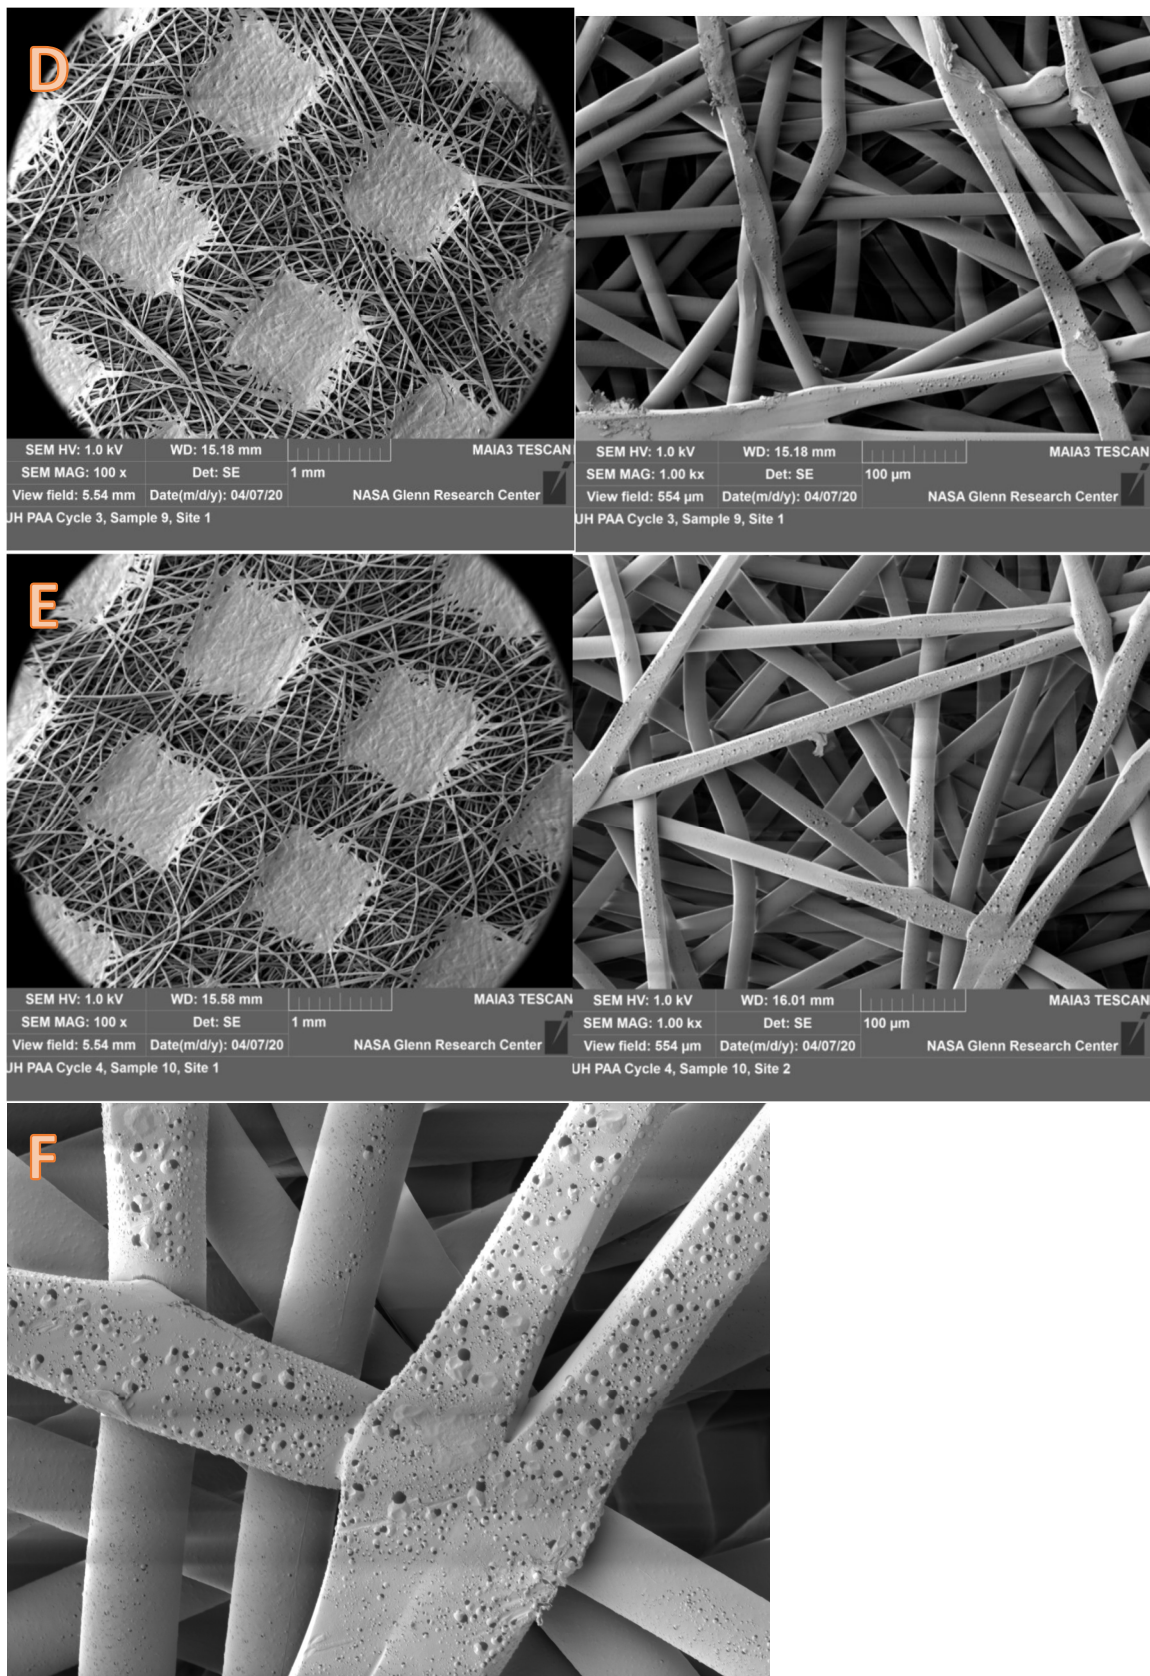

Legend: Figure 6 shows SEM images of the outer layer of the N95 mask under 100x (images in the left column) and 1000x magnification (images in the right column. A (control), B though E indicate multiple cycles of PAA treatment from 1-4. Note increase bubbling on the fibers after PAA exposure. Magnified image of bubbling on fibers (6F)

Figure: 7 (A,B)

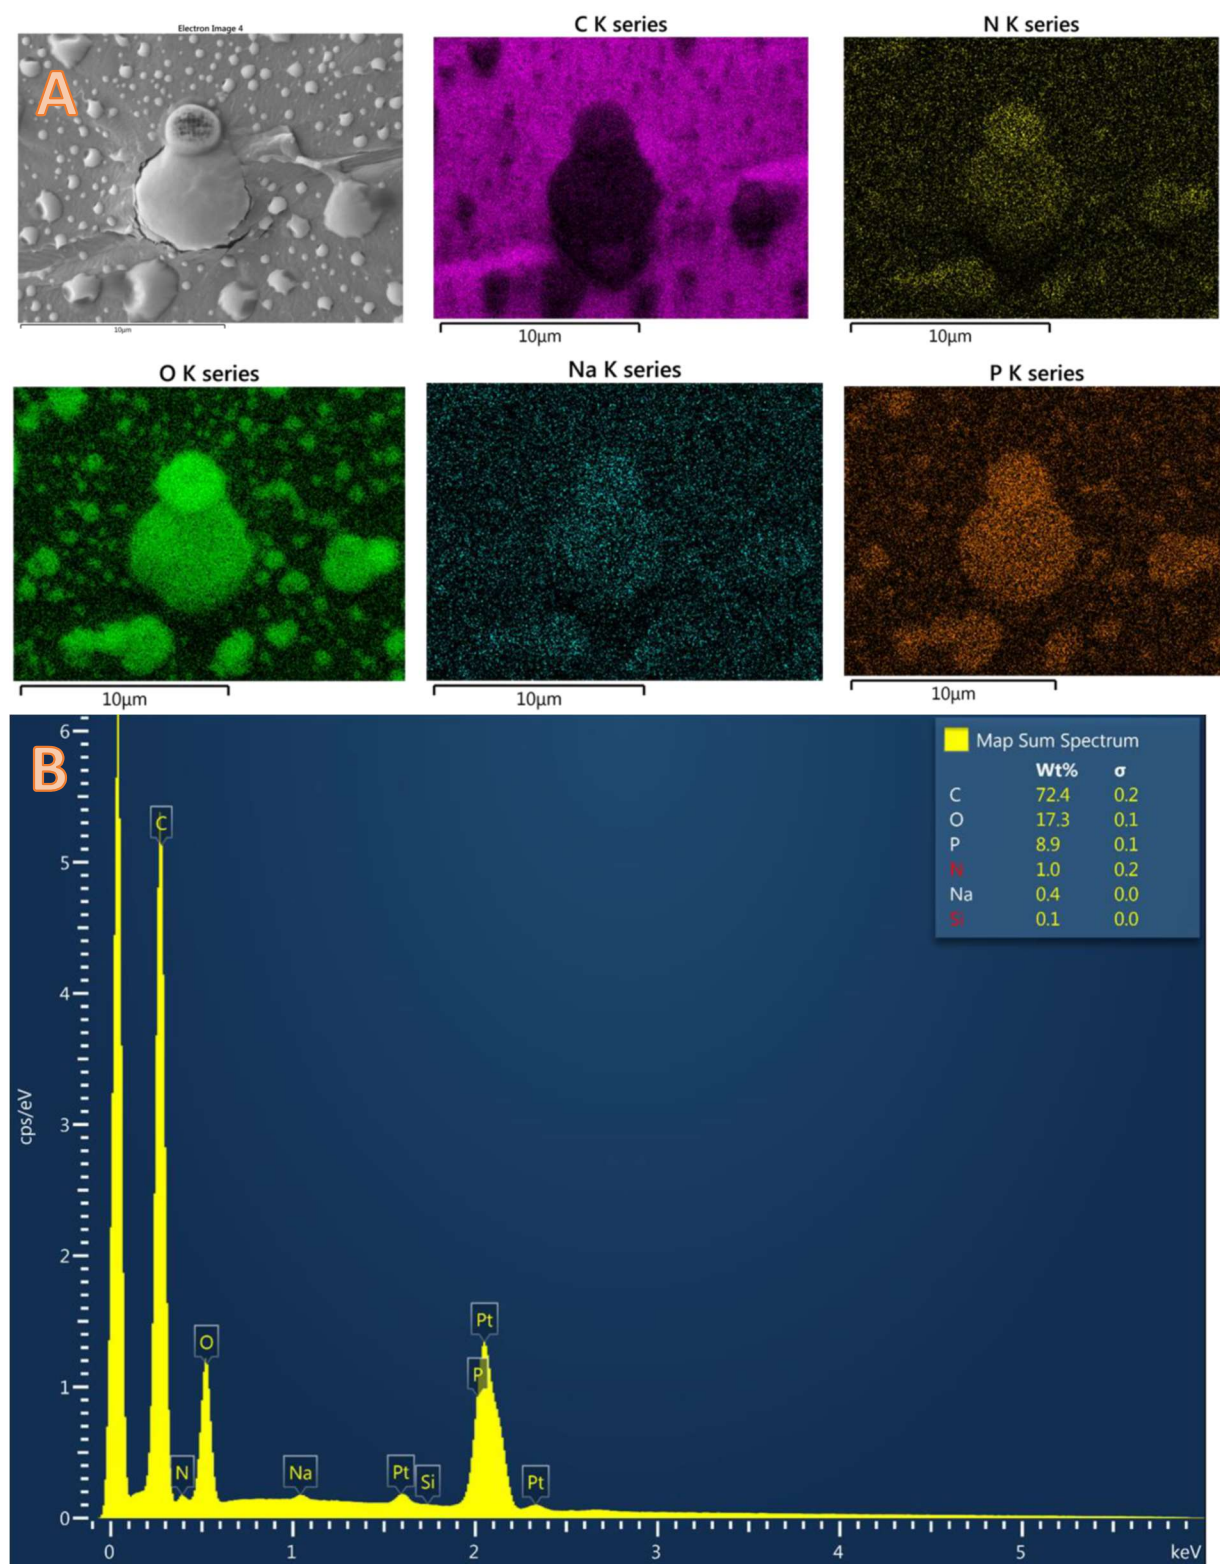

Legend: EDS showed that the bubbles are high in oxygen, phosphorous and nitrogen indicated by the bright areas of the dot map images (6A). Overall spectrograph shows that the surface is predominantly carbon, oxygen and phosphorous (6B)



**Figure 8: (A-C)**

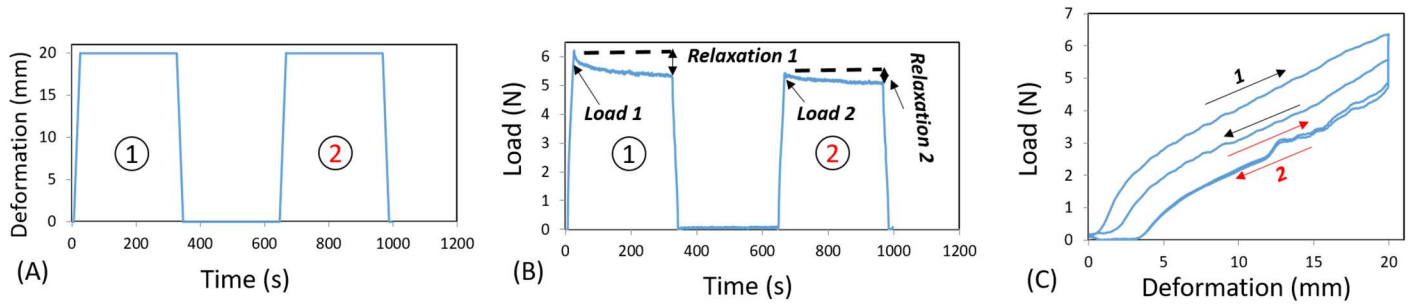

Legend: Figure 8: Two-cycle stress relaxation loading protocol. A) Deformation vs. time profile. B) Load vs. time profile and calculated variables. C) Load vs. deformation behavior over the two cycles.

**Figure 9:**

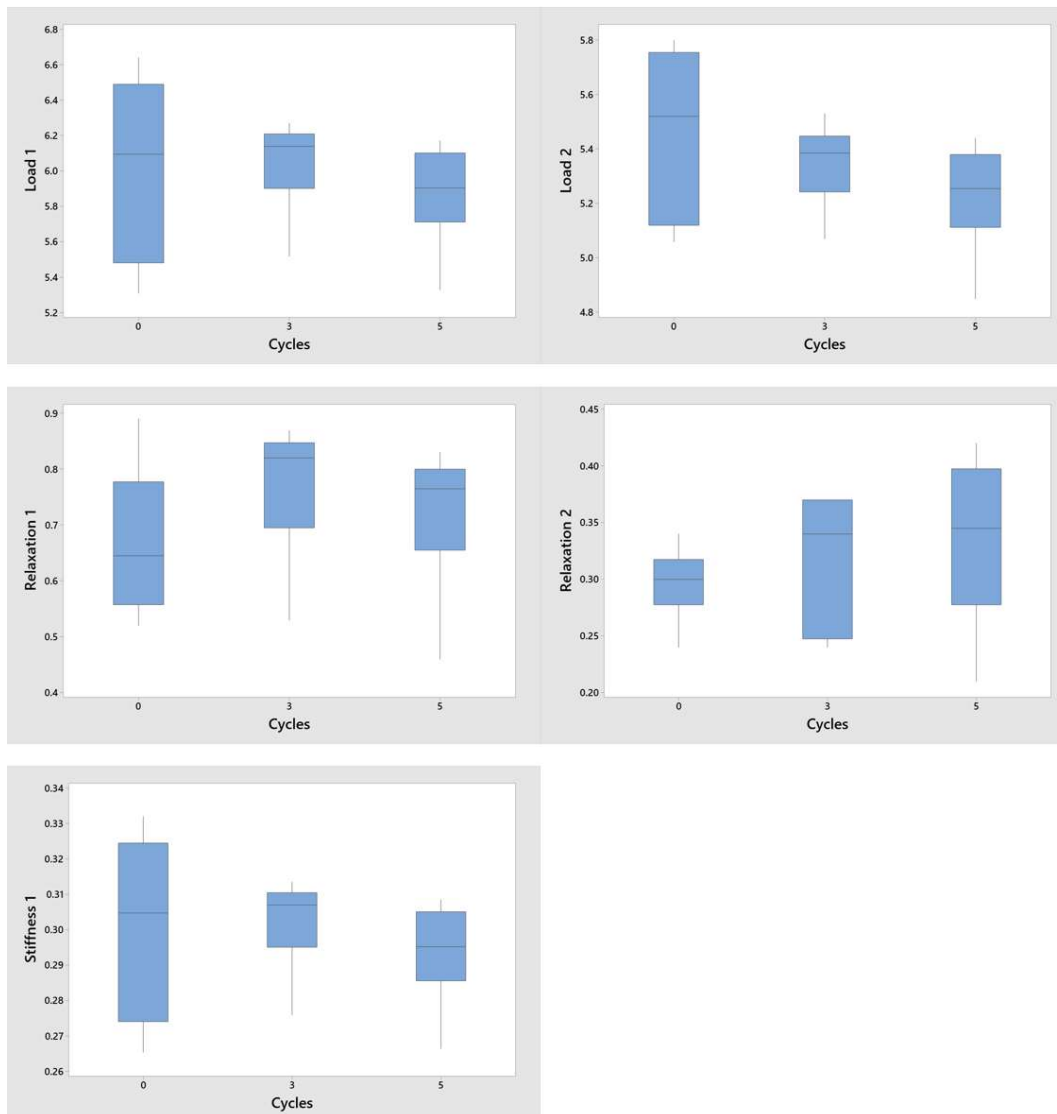

Legend: Interval plots for mechanical test variables as a function of disinfection cycles. The horizontal line is the median, the box indicates the interquartile range and the whiskers extend to the minimum and maximum values.

**Tables and Legends:**

**Table 1**

| No of cycles          | Contact angle (Degrees) |
|-----------------------|-------------------------|
| Control Mask (0 runs) | 97-99                   |
| 1x                    | 97-99                   |
| 2x                    | 97-99                   |
| 3x                    | 97-99                   |
| 4x                    | 97-99                   |

Legend: Table 1 shows the contact angle with repeated cycles of PAA disinfection. The cycle length was a dwell of 12 minutes and a deploy of 8 minutes. 'N'x indicates number of times the N95 FFR was treated with this cycle.

**Table 2**

| Number of cycles repeated | Flow rate (LPM) | Initial Resistance (mm of H <sub>2</sub> O) | Instantaneous Penetration (%) | Instantaneous Efficiency (%) | Result |
|---------------------------|-----------------|---------------------------------------------|-------------------------------|------------------------------|--------|
| 3x                        | 86              | 12.9                                        | 0.59                          | 99.41                        | Pass   |
| 3x                        | 86              | 13.5                                        | 0.31                          | 99.69                        | Pass   |
| 5x                        | 86              | 14                                          | 0.51                          | 99.49                        | Pass   |
| 5x                        | 86              | 13.3                                        | 0.84                          | 99.16                        | Pass   |
| Specification             | 81-89           |                                             |                               | ≥ 95                         |        |

Legend: Table 2 outlines the results of the instantaneous loading tests for filtration efficiency. The cycle length was a dwell of 16 minutes and a deploy of 32 minutes (optimal cycle). 'N'x indicates number of times the N95 FFR was treated with this cycle.

**Table 3**

| Number of cycles repeated | Flow rate (LPM) | Initial Resistance (mm of H <sub>2</sub> O) | Initial Penetration (%) | Maximum Penetration (%) | Filter Efficiency (%) | Result |
|---------------------------|-----------------|---------------------------------------------|-------------------------|-------------------------|-----------------------|--------|
| 5x                        | 85              | 14.9                                        | 0.56                    | 1.35                    | 98.65                 | Pass   |
| 5x                        | 86              | 13.8                                        | 0.6                     | 1.37                    | 98.63                 | Pass   |
| Specification             | 81-89           |                                             |                         | ≤ 5.0                   | ≥ 95                  |        |

Legend: Table 3 outlines the results of the full loading tests for filtration efficiency. The cycle length was a dwell of 16 minutes and a deploy of 32 minutes. 'N'x indicates number of times the N95 FFR was treated with this cycle.
